# Supplementary material for: Glycosylphosphatidylinositol-Anchor Synthesis in Plants: A Glycobiology Perspective
Source: PubMed Central journal article supplement (PMC7704450; doi:10.3389/fpls.2020.611188), 2020-11-17
Supplement: Data_Sheet_1.pdf [file Data_Sheet_1.pdf]

## ***GPI-anchor synthesis in plants – a glycobiology perspective***

Gernot Beihammer, Daniel Maresch, Friedrich Altmann, Richard Strasser

### ***Supplementary Material***

#### **Contents**

**Figure S1. LC-ESI-MS/MS analysis of the C-terminal peptide from *N. benthamiana* RFP-COB1.**

**Figure S2. LC-ESI-MS analysis of  $\alpha$ -mannosidase or  $\beta$ -galactosidase digested GPI-anchor derived from *N. benthamiana* expressed RFP-COB1.**

**Figure S3. LC-ESI-MS/MS analysis of  $\beta$ -galactosidase digested and mock-incubated GPI-anchor derived from RFP-COB1 expressed in *A. thaliana* seedlings.**

#### **Supplementary Methods**

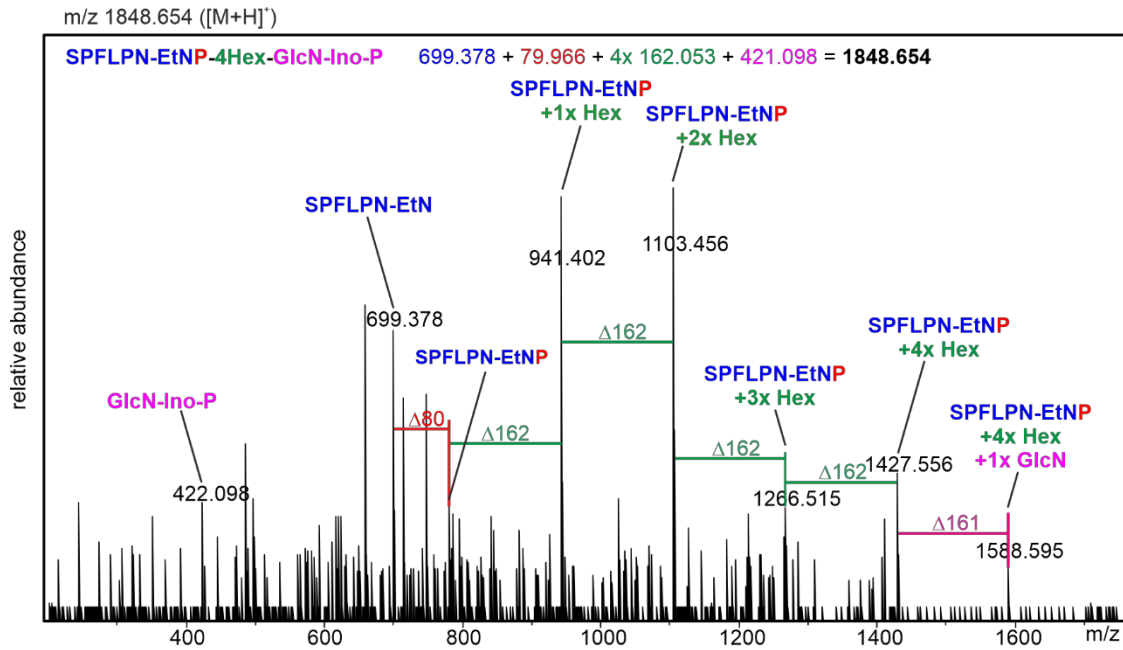

**Figure S1.** LC-ESI-MS/MS analysis of the C-terminal peptide from *N. benthamiana* RFP-COB1. RFP-COB1 was transiently expressed by agroinfiltration of leaves, captured by binding to RFP-Trap resin and subjected to PI-PLC and trypsin digestion. A representative analysis from two biological replicates is shown.

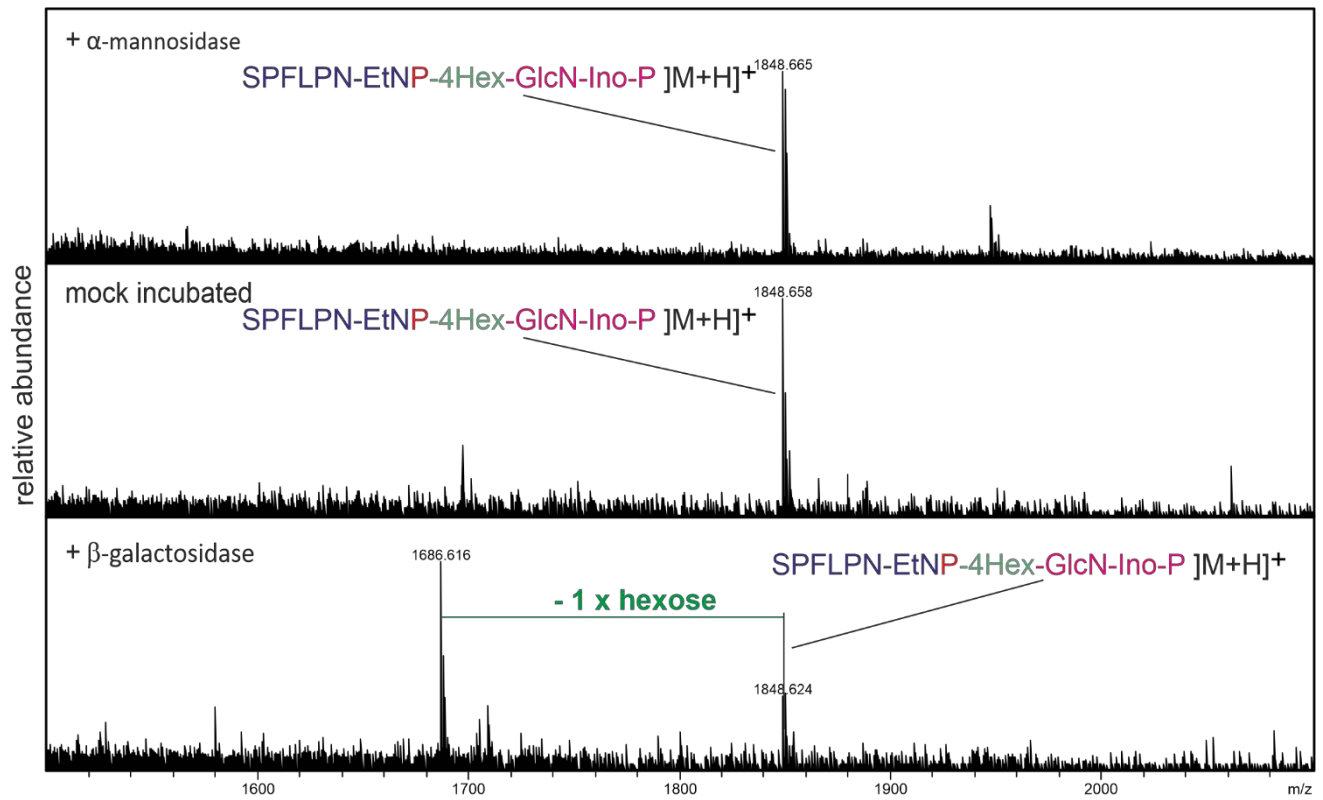

**Figure S2.** LC-ESI-MS analysis of  $\alpha$ -mannosidase or  $\beta$ -galactosidase digested GPI-anchor derived from *N. benthamiana* expressed RFP-COB1. The  $\beta$ -galactosidase digestion was carried out two times with identical results. A representative analysis is shown.

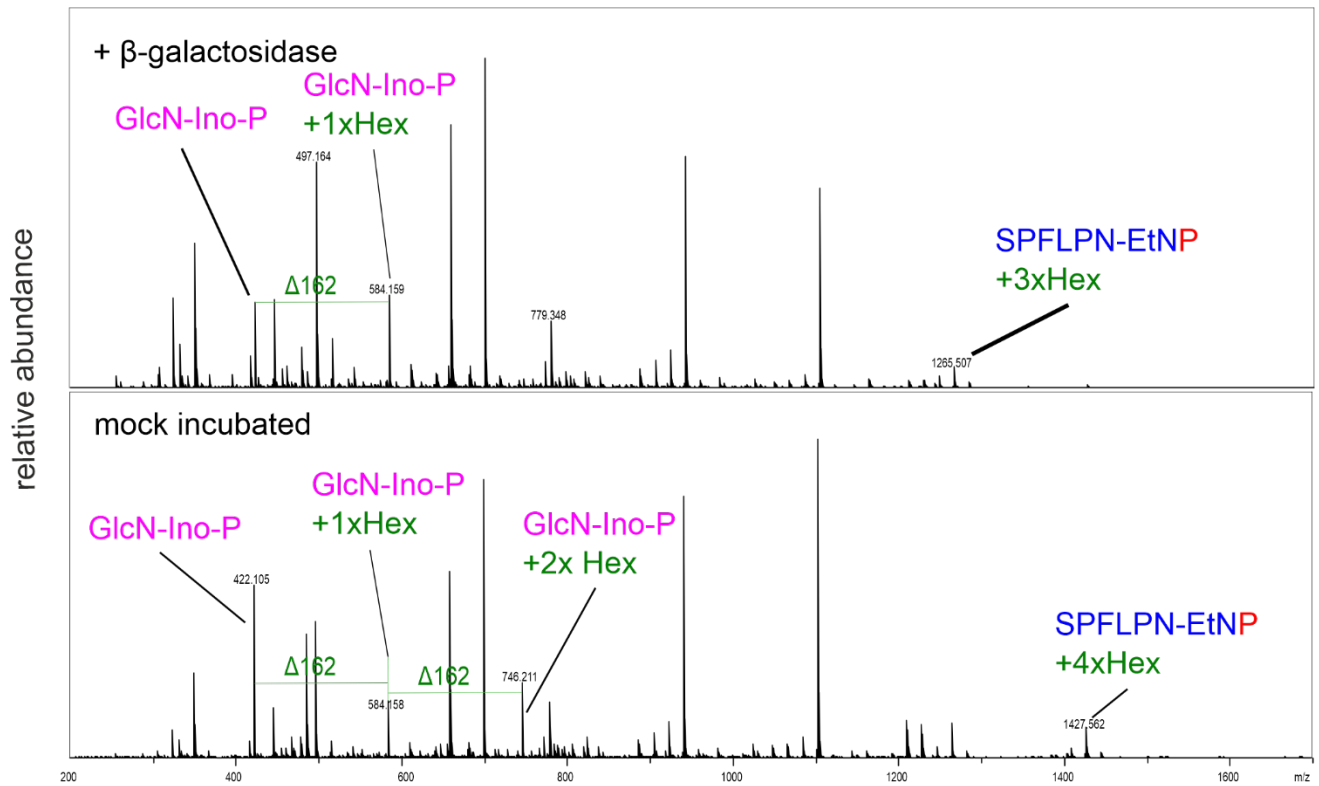

**Figure S3.** LC-ESI-MS/MS analysis of  $\beta$ -galactosidase digested and mock-incubated GPI-anchor derived from RFP-COB1 expressed in *A. thaliana* seedlings. A representative analysis from two technical replicates is shown.

## Supplementary Methods

The C-terminal peptide of COBRA\_ARATH was amplified from genomic DNA of *A. thaliana* using primers cob1\_5F (5'-TATAGGATCCCCTTTTCTTCCCAACGGTGGTTCC-3')/cob1\_6R (5'-TATACTCGAGTTAGGCAGAGAAGAAGAAAAAGAC-3') and cloned into a modified version of the pPT2-vector (Strasser *et al.* 2005) containing the Arabidopsis ubiquitin10-promotor and N-terminal mRFP. Reporter proteins were either purified from leaves of *N. benthamiana* following agroinfiltration or from 14-day old seedlings of stably transformed *A. thaliana*. Plant samples were snap frozen, grinded and the membrane fraction collected by centrifugation in 100 mM Tris, 25 % (w/v) sucrose and 5 % (v/v) glycerol buffer (pH 7.4) at 65000 g for 1 h at 4 °C. After washing in 100 mM Tris, 150 mM NaCl and 0.5 mM EDTA buffer (pH 7.4), the membrane pellet was resuspended in 20 mM Tris, 10 mM NaCl, 0.1 mM CaCl<sub>2</sub>, 1% (v/v) Phosphoinositide Phospholipase C (PIPLC, P6466, Thermo Fisher Scientific) (pH7.4) and incubated for 15 min. After cleavage of lipids from RFP-GPI, the protein was purified using RFP trap (Chromotek), separated by SDS-PAGE, excised from the gel, reduced, S-carbamidomethylated and subjected to tryptic digest as described previously (Kolarich and Altmann 2000). The resulting GPI-bearing peptide fragment was analyzed via LC-ESI-MS/MS using a Bruker Maxis 4G Q-TOF instrument. For enzymatic deglycosylation of the GPI anchor, either  $\beta$ -galactosidase from *Aspergillus oryzae* (Zeleny *et al.* 1997) or  $\alpha$ -mannosidase from *Canavalia ensiformis* (M7257, Sigma-Aldrich) was used. RFP-GPI was purified once from *A. thaliana* and two times from *N. benthamiana*.

## References

- Kolarich, D. and Altmann, F. (2000). N-Glycan analysis by matrix-assisted laser desorption/ionization mass spectrometry of electrophoretically separated nonmammalian proteins: application to peanut allergen Ara h 1 and olive pollen allergen Ole e 1. *Anal Biochem.* 285, 64-75.
- Strasser, R., Stadlmann, J., Svoboda, B., Altmann, F., Glössl, J. and Mach, L. (2005). Molecular basis of N-acetylglucosaminyltransferase I deficiency in *Arabidopsis thaliana* plants lacking complex N-glycans. *Biochem J.* 387, 385-91.
- Zeleny, R., Altmann, F. and Praznik, W. (1997). A capillary electrophoretic study on the specificity of beta-galactosidases from *Aspergillus oryzae*, *Escherichia coli*, *Streptococcus pneumoniae*, and *Canavalia ensiformis* (jack bean). *Anal Biochem.* 246, 96-101.
